# Supplementary material for: Hook tool manufacture in New Caledonian crows: behavioural variation and the influence of raw materials
Source: PubMed Central journal article supplement (PMC4650250; doi:10.1186/s12915-015-0204-7), 2015-11-18
Supplement: 12915_2015_204_MOESM2_ESM.pdf [file 12915_2015_204_MOESM2_ESM.pdf]

**Supplementary Table 1** Behavioural actions during hooked stick tool manufacture.

| Stage                                                            | Action type                     | Coding | Definition                                                                                                                                                        |
|------------------------------------------------------------------|---------------------------------|--------|-------------------------------------------------------------------------------------------------------------------------------------------------------------------|
| Release of basic tool                                            | Cut                             | Event  | Detachment happens at the point of grip.                                                                                                                          |
|                                                                  | Pull                            | Event  | Detachment happens away from the point of grip.                                                                                                                   |
| Actions completed through multiple attempts / incomplete attempt | Incomplete attempt              | Event  | The subject tries an action and fails to complete it.                                                                                                             |
|                                                                  | Most-effective attempt          | Event  | An action is completed through multiple attempts and this is the most-effective attempt (not the last, see below).                                                |
|                                                                  | Last attempt                    | Event  | An action is completed through multiple attempts and this is the last attempt (not the most-effective, see below).                                                |
|                                                                  | Most-effective and last attempt | Event  | An action is completed through multiple attempts, and the most-effective attempt is the last attempt.                                                             |
| Processing of basic tool                                         | Sever hook shaft                | Event  | The subject shortens the hook shaft by severing the stem instantaneously.                                                                                         |
|                                                                  | Sever tool shaft                | Event  | The subject shortens the tool shaft by severing the stem instantaneously.                                                                                         |
|                                                                  | Sever root shaft                | Event  | The subject shortens the root shaft by severing the stem instantaneously.                                                                                         |
|                                                                  | Nibble tool shaft               | State  | The subject processes the tool shaft by nibbling the end of it. This does not involve severing the stem instantaneously.                                          |
|                                                                  | Process hook                    | State  | The subject crafts the hook of the basic tool or tool by nibbling it or peeling bark from it.                                                                     |
|                                                                  | Bend tool shaft                 | State  | The subject actively deforms the tool shaft of the basic tool or tool. This action is further classified based on how the subject carries it out (see main text). |
| Deployment of tool                                               | Insert tool                     | Event  | The subject holds the tool in its bill and inserts it into a hole. This is only scored when the subject first inserts the tool.                                   |
| End of scoring                                                   | Successful                      | Event  | The subject extracts bait.                                                                                                                                        |
|                                                                  | Abandoned                       | Event  | The subject abandons the tool for at least two minutes.                                                                                                           |
|                                                                  | Time-out                        | Event  | The subject has neither extracted bait nor abandoned the tool five minutes after the first insertion.                                                             |
