# Supplementary material for: Hook tool manufacture in New Caledonian crows: behavioural variation and the influence of raw materials
Source: PubMed Central journal article supplement (PMC4650250; doi:10.1186/s12915-015-0204-7), 2015-11-18
Supplement: 12915_2015_204_MOESM7_ESM.pdf [file 12915_2015_204_MOESM7_ESM.pdf]

### Experiment 1

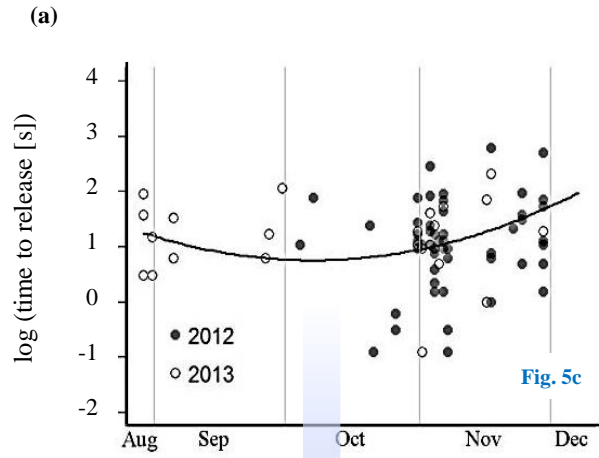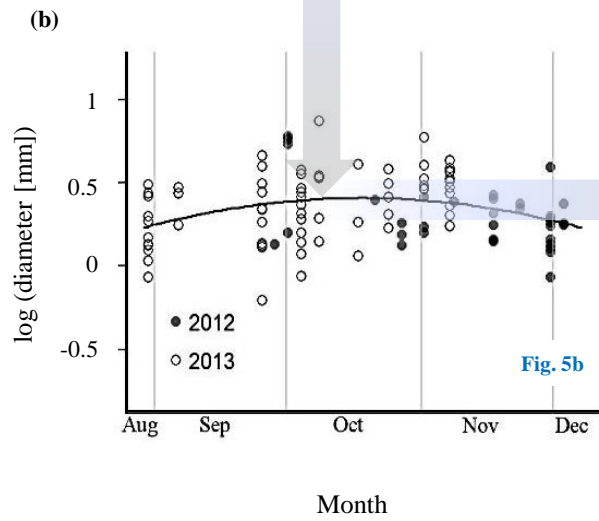

### Experiment 2

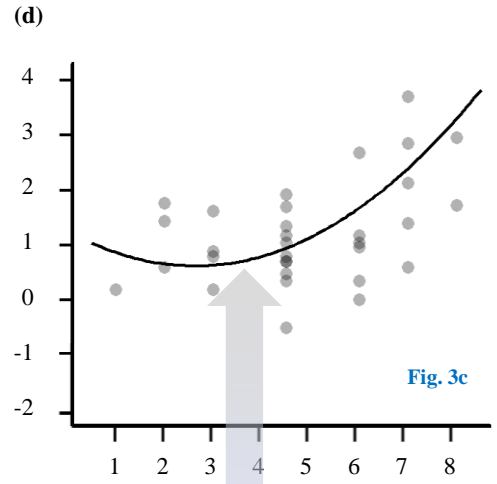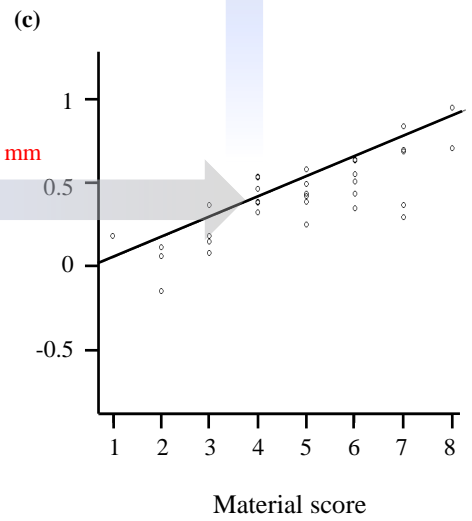

ca. 7 October

ca. 1.4 mm
